# Supplementary material for: Emergence of E484K Mutation Following Bamlanivimab Monotherapy among High-Risk Patients Infected with the Alpha Variant of SARS-CoV-2
Source: MDPI journal article supplement (doi:10.3390/v13081642), 2021-08-19
Supplement: s1 [file s1]

**Supplementary Table S1.** Mutations observed for each viral sequence. Each mutation from the Wuhan reference genome is indicated by a “•”.

| Patient ID                       |                    |               | #1 |    |    |    | #2 |    |    |    | #3 |    |    |    | #4 |    | #5 |    |    | #6 |    |    |    |    |    |
|----------------------------------|--------------------|---------------|----|----|----|----|----|----|----|----|----|----|----|----|----|----|----|----|----|----|----|----|----|----|----|
| Days after Bamlanivimab infusion |                    |               | 2  | 4  | 6  | 7  | 3  | 5  | 6  | 7  | 9  | 1  | 2  | 3  | 12 | 3  | 14 | 15 | 19 | 26 | 0  | 3  | 5  | 7  | 23 |
| Ct values                        |                    |               | 19 | 35 | 20 | 23 | 25 | 26 | 29 | 26 | 24 | 16 | 23 | 24 | 28 | 20 | 21 | 16 | 27 | 27 | 16 | 21 | 29 | 20 | 19 |
| Gene                             | Mutation           |               |    |    |    |    |    |    |    |    |    |    |    |    |    |    |    |    |    |    |    |    |    |    |    |
|                                  | Nucleotide         | Amino-acid    |    |    |    |    |    |    |    |    |    |    |    |    |    |    |    |    |    |    |    |    |    |    |    |
|                                  | 913-C_T            | S216S         | •  | •  | •  | •  | •  | •  | •  | •  | •  | •  | •  | •  | •  | •  | •  | •  | •  | •  | •  | •  | •  | •  | •  |
|                                  | 1489-C_T           | G408G         | •  | •  | •  | •  | •  | -  | •  | •  | •  | •  | •  | •  | •  | •  | •  | -  | -  | -  | •  | •  | •  | •  | •  |
|                                  | 1730-G_A           | E489K         | •  | •  | •  | •  | •  | •  | •  | •  | •  | •  | •  | •  | •  | •  | •  | -  | -  | -  | •  | •  | •  | •  | •  |
|                                  | 2110-C_T           | N615N         | •  | •  | •  | •  | •  | •  | •  | •  | •  | •  | •  | •  | •  | •  | •  | -  | -  | -  | •  | •  | •  | •  | •  |
|                                  | 3037-C_T           | F924F         | •  | •  | •  | •  | -  | -  | •  | •  | •  | •  | •  | •  | •  | •  | •  | •  | •  | •  | •  | •  | •  | -  | •  |
|                                  | 3267-C_T           | T1001I        | •  | •  | •  | •  | •  | •  | •  | •  | •  | •  | •  | •  | •  | •  | •  | •  | •  | •  | •  | •  | •  | •  | •  |
|                                  | 3773-C_T           | R1170C        | -  | -  | -  | -  | -  | -  | •  | -  | •  | -  | -  | -  | -  | -  | -  | -  | -  | -  | -  | -  | -  | -  | -  |
|                                  | 5388-C_A           | A1708D        | •  | •  | •  | •  | •  | •  | •  | •  | •  | •  | •  | •  | •  | •  | •  | •  | •  | •  | •  | •  | •  | •  | •  |
|                                  | 5986-C_T           | F1907F        | •  | •  | •  | •  | •  | •  | •  | •  | •  | •  | •  | •  | •  | •  | •  | •  | •  | •  | •  | •  | •  | •  | •  |
|                                  | 6954-T_C           | I2230T        | •  | •  | •  | •  | •  | •  | •  | •  | •  | •  | •  | •  | •  | •  | •  | •  | •  | •  | •  | •  | •  | •  | •  |
|                                  | 7184-A_G           | I2307V        | •  | -  | •  | •  | •  | •  | •  | •  | •  | •  | -  | -  | •  | •  | •  | -  | -  | -  | -  | -  | •  | •  | -  |
|                                  | 11288-GTCTGGTTTT_G | Del 3675-3677 | •  | •  | •  | •  | •  | •  | •  | •  | •  | •  | •  | •  | •  | •  | •  | •  | •  | •  | •  | •  | •  | •  | •  |
|                                  | 11565-C_T          | P3767L        | •  | •  | •  | •  | •  | •  | •  | •  | •  | •  | •  | •  | •  | •  | •  | -  | -  | -  | •  | •  | •  | •  | •  |
|                                  | 12895-A_C          | E4210D        | -  | -  | -  | -  | -  | -  | -  | •  | -  | -  | -  | -  | -  | -  | -  | -  | -  | -  | -  | -  | -  | -  | -  |
| ORF1b                            | 13899-T_G          | D144E         | -  | -  | -  | -  | -  | -  | -  | -  | -  | -  | -  | -  | -  | -  | -  | •  | •  | •  | -  | -  | -  | -  | -  |
|                                  | 14120-C_T          | P218L         | •  | •  | •  | •  | •  | •  | •  | •  | •  | •  | •  | •  | •  | •  | •  | -  | -  | -  | •  | •  | •  | •  | •  |
|                                  | 14277-G_A          | R270R         | -  | -  | -  | -  | -  | -  | -  | -  | -  | -  | -  | -  | -  | -  | -  | •  | •  | •  | -  | -  | -  | -  | -  |
|                                  | 14408-C_T          | P314L         | •  | •  | •  | •  | •  | •  | •  | •  | •  | •  | •  | •  | •  | •  | •  | •  | •  | •  | •  | •  | •  | •  | •  |
|                                  | 14676-C_T          | P403P         | •  | •  | •  | •  | •  | •  | •  | •  | •  | •  | •  | •  | •  | •  | •  | •  | •  | •  | •  | •  | •  | •  | •  |
|                                  | 15096-T_C          | N543N         | -  | -  | -  | -  | -  | -  | -  | -  | -  | -  | -  | -  | -  | -  | -  | •  | •  | •  | -  | -  | -  | -  | -  |
|                                  | 15279-C_T          | H604H         | •  | •  | •  | •  | •  | •  | •  | •  | •  | •  | •  | •  | •  | •  | •  | •  | •  | •  | •  | •  | •  | •  | •  |
|                                  | 15672-G_T          | E735D         | -  | -  | -  | -  | -  | -  | -  | -  | -  | -  | -  | -  | -  | -  | -  | •  | •  | •  | -  | -  | -  | -  | -  |
|                                  | 16176-T_C          | T903T         | •  | •  | •  | •  | •  | •  | •  | •  | •  | •  | •  | •  | •  | •  | •  | •  | •  | •  | •  | •  | •  | •  | •  |
|                                  | 16254-T_C          | V929V         | -  | -  | -  | -  | -  | -  | -  | -  | -  | -  | -  | -  | -  | -  | -  | -  | -  | •  | -  | -  | -  | -  | -  |
| S                                | 21736-C_T          | F58F          | •  | •  | •  | -  | -  | -  | -  | -  | •  | •  | -  | •  | •  | •  | •  | -  | -  | -  | -  | -  | •  | -  | •  |
|                                  | 21765-ATACATG_A    | Del 69-70     | •  | •  | •  | •  | •  | •  | •  | •  | •  | •  | •  | •  | •  | •  | •  | •  | •  | •  | •  | •  | •  | •  | •  |
|                                  | 21991-TTTA_T       | Del 144       | •  | •  | •  | •  | •  | •  | •  | •  | •  | •  | •  | •  | •  | •  | •  | •  | •  | •  | •  | •  | •  | •  | •  |
|                                  | 23012-G_A          | E484K         | -  | -  | •  | -  | -  | -  | -  | •  | -  | -  | -  | -  | •  | -  | •  | -  | -  | •  | -  | -  | -  | -  | -  |
|                                  | 23013-A_C          | E484A         | -  | -  | -  | -  | -  | -  | •  | -  | •  | -  | -  | -  | -  | -  | -  | -  | -  | -  | -  | -  | -  | -  | -  |
|                                  | 23040-A_G          | Q493R         | -  | -  | -  | -  | -  | -  | -  | -  | -  | -  | -  | -  | -  | -  | -  | -  | -  | -  | -  | -  | -  | •  |    |
|                                  | 23042-T_C          | S494P         | -  | -  | -  | •  | -  | -  | -  | -  | -  | -  | -  | -  | -  | -  | -  | -  | -  | -  | -  | -  | -  | -  | -  |
|                                  | 23063-A_T          | N501Y         | •  | •  | •  | •  | •  | •  | •  | •  | •  | •  | •  | •  | •  | •  | •  | •  | •  | •  | •  | •  | •  | •  | •  |
|                                  | 23271-C_A          | A570D         | •  | •  | •  | •  | •  | •  | •  | •  | •  | •  | •  | •  | •  | •  | •  | •  | •  | •  | •  | •  | •  | •  | •  |
|                                  | 23403-A_G          | D614G         | •  | •  | •  | •  | •  | •  | •  | •  | •  | •  | •  | •  | •  | •  | •  | •  | •  | •  | •  | •  | •  | •  | •  |
|                                  | 23604-C_A          | P681H         | •  | •  | •  | •  | •  | •  | •  | •  | •  | •  | •  | •  | •  | •  | •  | •  | •  | •  | •  | •  | •  | •  | •  |
|                                  | 23709-C_T          | T716I         | •  | •  | •  | •  | •  | •  | •  | •  | •  | •  | •  | •  | •  | •  | •  | •  | •  | •  | •  | •  | •  | •  | •  |
|                                  | 24328-G_C          | L922F         | -  | -  | -  | -  | -  | -  | -  | -  | -  | -  | -  | -  | •  | -  | -  | -  | -  | -  | -  | -  | -  | -  | -  |
|                                  | 24506-T_G          | S982A         | •  | •  | •  | •  | •  | •  | •  | •  | •  | •  | •  | •  | •  | •  | •  | •  | •  | •  | •  | •  | •  | •  | •  |
|                                  | 24914-G_C          | D1118H        | •  | •  | •  | •  | •  | •  | •  | •  | •  | •  | •  | •  | •  | •  | •  | •  | •  | •  | •  | •  | •  | •  | •  |
|                                  | 24919-C_T          | N1119N        | -  | -  | -  | -  | -  | -  | -  | -  | -  | -  | -  | -  | -  | -  | -  | •  | •  | •  | -  | -  | -  | -  | -  |
|                                  | 25352-G_T          | V1264L        | -  | -  | -  | -  | -  | -  | -  | -  | -  | -  | -  | -  | -  | -  | -  | •  | •  | •  | -  | -  | -  | -  | -  |
| ORF3a                            | 25785-G_T          | W131C         | -  | -  | -  | -  | -  | -  | -  | -  | -  | -  | -  | -  | -  | -  | -  | •  | •  | •  | -  | -  | -  | -  | -  |
| ORF7a                            | 27647-A_G          | K85R          | •  | -  | -  | -  | -  | -  | -  | -  | -  | -  | -  | -  | -  | -  | -  | -  | -  | -  | -  | -  | -  | -  | -  |
| ORF8                             | 27972-C_T          | Q27*          | •  | •  | •  | •  | •  | •  | •  | •  | •  | •  | •  | •  | •  | •  | •  | •  | •  | •  | •  | •  | •  | •  | •  |
|                                  | 28048-G_T          | R52I          | •  | •  | •  | •  | •  | •  | •  | •  | •  | •  | •  | •  | •  | •  | •  | •  | •  | •  | •  | •  | •  | •  | •  |
|                                  | 28095-A_T          | K68*          | •  | •  | •  | •  | •  | •  | •  | •  | •  | •  | •  | •  | •  | •  | •  | •  | •  | •  | •  | •  | •  | •  | •  |

[illegible]
